# Supplementary material for: A qualitative study of mentors’ perceptions and experiences of a near-peer mentoring program for medical students
Source: Frontiers journal article supplement (doi:10.3389/feduc.2024.1372697), 2024-03-19
Supplement: Data_Sheet_2.pdf [file Data_Sheet_2.pdf]

**SUPPLEMENTARY MATERIAL – Table 1**

**Completed checklist of the consolidated criteria for reporting qualitative research (COREQ)<sup>1</sup>**

| <b>No. Item</b>                                | <b>Description</b>                                                                                                                                                                                                                                                                                                                                                                                                                                                                                                                                                                                                                |
|------------------------------------------------|-----------------------------------------------------------------------------------------------------------------------------------------------------------------------------------------------------------------------------------------------------------------------------------------------------------------------------------------------------------------------------------------------------------------------------------------------------------------------------------------------------------------------------------------------------------------------------------------------------------------------------------|
| <b>Domain 1: Research team and reflexivity</b> |                                                                                                                                                                                                                                                                                                                                                                                                                                                                                                                                                                                                                                   |
| <i>Personal Characteristics</i>                |                                                                                                                                                                                                                                                                                                                                                                                                                                                                                                                                                                                                                                   |
| 1. Facilitator                                 | Lea Pölczman                                                                                                                                                                                                                                                                                                                                                                                                                                                                                                                                                                                                                      |
| 2. Credentials                                 | Lea Pölczman (MSc), Márk Jámor (MD), Zsuzsa Györffy (PhD), György Purebl (MD, PhD), András Végh (MD), Edmond Girasek (PhD)                                                                                                                                                                                                                                                                                                                                                                                                                                                                                                        |
| 3. Occupation                                  | LP, MJ, AV: research associate; ZsGy: associate professor; GyP: professor; EG: assistant professor                                                                                                                                                                                                                                                                                                                                                                                                                                                                                                                                |
| 4. Gender                                      | LP, ZsGy: female; MJ, GyP, AV, EG: male                                                                                                                                                                                                                                                                                                                                                                                                                                                                                                                                                                                           |
| 5. Experience and training                     | PL: educational background in psychology, practical experience in mental health research and teaching; MJ: medical education, practical experience as a physician and in teaching; ZsGy educational background in sociology and psychology, experience in mental health research, qualitative research and teaching; GyP: medical education, psychiatrist, and psychotherapist, experience in behavioural sciences and teaching; AV: medical education, practical experience as a physician and in teaching; EG educational background in sociology and health sciences, experience in occupational health research and teaching. |
| <i>Relationship with participants</i>          |                                                                                                                                                                                                                                                                                                                                                                                                                                                                                                                                                                                                                                   |
| 6. Relationship established                    | No                                                                                                                                                                                                                                                                                                                                                                                                                                                                                                                                                                                                                                |
| 7. Participant knowledge of the interviewer    | Participants knew that LP was a psychologist and a PhD student researching on student health                                                                                                                                                                                                                                                                                                                                                                                                                                                                                                                                      |
| 8. Interviewer characteristics                 | No other characteristics were reported about the facilitator                                                                                                                                                                                                                                                                                                                                                                                                                                                                                                                                                                      |
| <b>Domain 2: study design</b>                  |                                                                                                                                                                                                                                                                                                                                                                                                                                                                                                                                                                                                                                   |
| <i>Theoretical framework</i>                   |                                                                                                                                                                                                                                                                                                                                                                                                                                                                                                                                                                                                                                   |
| 9. Methodological orientation and Theory       | Thematic analysis by Braun and Clarke                                                                                                                                                                                                                                                                                                                                                                                                                                                                                                                                                                                             |
| <i>Participant selection</i>                   |                                                                                                                                                                                                                                                                                                                                                                                                                                                                                                                                                                                                                                   |
| 10. Sampling                                   | Purposive sampling                                                                                                                                                                                                                                                                                                                                                                                                                                                                                                                                                                                                                |
| 11. Method of approach                         | Via advertisement on social media or email                                                                                                                                                                                                                                                                                                                                                                                                                                                                                                                                                                                        |
| 12. Sample size                                | 26 participants                                                                                                                                                                                                                                                                                                                                                                                                                                                                                                                                                                                                                   |
| 13. Non-participation                          | Not applicable                                                                                                                                                                                                                                                                                                                                                                                                                                                                                                                                                                                                                    |
| <i>Setting</i>                                 |                                                                                                                                                                                                                                                                                                                                                                                                                                                                                                                                                                                                                                   |
| 14. Setting of data collection                 | Seminar room at the university                                                                                                                                                                                                                                                                                                                                                                                                                                                                                                                                                                                                    |
| 15. Presence of non-participants               | No                                                                                                                                                                                                                                                                                                                                                                                                                                                                                                                                                                                                                                |
| 16. Description of sample                      | Mean <sub>age</sub> = 22.04 (SD = 2.163; Range: 20-24 years); female = 61.5%, male = 38.5%                                                                                                                                                                                                                                                                                                                                                                                                                                                                                                                                        |
| <i>Data collection</i>                         |                                                                                                                                                                                                                                                                                                                                                                                                                                                                                                                                                                                                                                   |
| 17. Interview guide                            | Provided as supplemental material                                                                                                                                                                                                                                                                                                                                                                                                                                                                                                                                                                                                 |
| 18. Repeat interviews                          | No                                                                                                                                                                                                                                                                                                                                                                                                                                                                                                                                                                                                                                |
| 19. Audio/visual recording                     | Audio recording                                                                                                                                                                                                                                                                                                                                                                                                                                                                                                                                                                                                                   |
| 20. Field notes                                | Yes                                                                                                                                                                                                                                                                                                                                                                                                                                                                                                                                                                                                                               |
| 21. Duration                                   | Circa 60-90 minutes                                                                                                                                                                                                                                                                                                                                                                                                                                                                                                                                                                                                               |
| 22. Data saturation                            | Yes                                                                                                                                                                                                                                                                                                                                                                                                                                                                                                                                                                                                                               |
| 23. Transcripts returned                       | No                                                                                                                                                                                                                                                                                                                                                                                                                                                                                                                                                                                                                                |
| <b>Domain 3: analysis and findings</b>         |                                                                                                                                                                                                                                                                                                                                                                                                                                                                                                                                                                                                                                   |
| <i>Data analysis</i>                           |                                                                                                                                                                                                                                                                                                                                                                                                                                                                                                                                                                                                                                   |
| 24. Number of data coders                      | Two                                                                                                                                                                                                                                                                                                                                                                                                                                                                                                                                                                                                                               |
| 25. Description of the coding tree             | Yes                                                                                                                                                                                                                                                                                                                                                                                                                                                                                                                                                                                                                               |
| 26. Derivation of themes                       | A deductive approach was adopted, the themes were derived from the data.                                                                                                                                                                                                                                                                                                                                                                                                                                                                                                                                                          |
| 27. Software                                   | None                                                                                                                                                                                                                                                                                                                                                                                                                                                                                                                                                                                                                              |
| 28. Participant checking                       | No                                                                                                                                                                                                                                                                                                                                                                                                                                                                                                                                                                                                                                |
| <i>Reporting</i>                               |                                                                                                                                                                                                                                                                                                                                                                                                                                                                                                                                                                                                                                   |
| 29. Quotations presented                       | Yes                                                                                                                                                                                                                                                                                                                                                                                                                                                                                                                                                                                                                               |
| 30. Data and findings consistent               | Yes                                                                                                                                                                                                                                                                                                                                                                                                                                                                                                                                                                                                                               |
| 31. Clarity of major themes                    | Yes                                                                                                                                                                                                                                                                                                                                                                                                                                                                                                                                                                                                                               |
| 32. Clarity of minor themes                    | Yes                                                                                                                                                                                                                                                                                                                                                                                                                                                                                                                                                                                                                               |

1. Tong A, Sainsbury P, Craig J. Consolidated criteria for reporting qualitative research (COREQ): a 32-item checklist for interviews and focus groups. *International Journal for Quality in Health Care*. 2007. Volume 19, Number 6: pp. 349 – 357.
